# Supplementary material
Source: Research Square preprint supplement (doi:10.21203/rs.3.rs-9069507/v1)
Supplement: Supplementary file 1 [file 135936b24342bd499e86fb45.docx]

|  | **Requirement** | **Manuscript** |
| --- | --- | --- |
| **Title** | Clearly identifies innovation, surgical approach, and case nature | Title specifies hybrid trans-oral–trans-buccal robotic technique and salvage setting |
| **Abstract** | Summarizes background, technical innovation, case, and outcome | Structured abstract describing exposure limitation, hybrid solution, and postoperative success |
| **Keywords** | Include technique, pathology, and innovation descriptors | Keywords include robotic surgery, trans-buccal corridor, trismus, salvage oncology |
| **Background / Introduction** | Describes clinical problem, current standards, and limitations | Introduction explains dependence of robotic surgery on exposure and challenges in irradiated patients |
| **Rationale for Innovation** | Explains why new technique was necessary | Rationale section details impossibility of conventional docking and risks of mandibulotomy |
| **Patient Information** | Demographics, prior disease, and treatments | History of tongue carcinoma, radiation, recurrence, and disease-free interval documented |
| **Clinical Findings** | Symptoms and examination limitations | Absolute trismus and facial pain described with quantified mouth opening |
| **Diagnostic Assessment** | Imaging, pathology, and staging information | PET-CT findings and biopsy confirming second primary SCC reported |
| **Decision-Making Process** | Multidisciplinary planning and operative intent | Tumor board discussion and salvage intent documented |
| **Surgical Planning** | Planned procedure and reconstructive considerations | Planned robotic tonsillectomy with adjunct procedures described |
| **Description of Technique** | Detailed explanation of innovation and access modification | Hybrid approach with trans-oral camera and trans-buccal robotic arm clearly described |
| **Equipment / Platform** | Robotic system or instruments specified | Robotic system from Intuitive Surgical mentioned |
| **Intra-operative Details** | Positioning, triangulation, ergonomics, safety | Operative angulation, working corridor, and fibrotic field handling explained |
| **Safety Considerations** | Steps taken to avoid complications | Discussion notes incision planning, visualization strategy, and team coordination |
| **Postoperative Outcomes** | Recovery, complications, histology | Early extubation, oral intake, discharge timing, and margin-negative pathology reported |
| **Follow-up** | Functional and oncologic results over time | Three-month disease-free follow-up with preserved speech and swallowing documented |
| **Discussion of Novelty** | Comparison with existing techniques and literature | Discussion highlights rarity of robotic trans-buccal access in absolute trismus |
| **Strengths & Limitations** | Advantages, risks, learning curve, reproducibility | Separate section addressing applicability and need for expertise |
| **Clinical Implications** | Impact on future surgical practice | Implications section discusses expanded candidacy for minimally invasive salvage surgery |
| **Conclusion** | Summarizes innovation and clinical relevance | Conclusion emphasizes restoration of exposure without mandibulotomy |
| **Ethical Compliance** | Consent and confidentiality statements | Written informed consent included |
| **Conflict of Interest** | Disclosure statement present | Included |
| **Funding** | Financial disclosure included | Included |
| **Author Contributions** | Roles transparently stated | Included |
| **Data Availability** | Access to data clarified | Included |
|  |  |  |
|  |  |  |
|  |  |  |
|  |  |  |
|  |  |  |
|  |  |  |
|  |  |  |
|  |  |  |
|  |  |  |
|  |  |  |
|  |  |  |
|  |  |  |
|  |  |  |
|  |  |  |
|  |  |  |
|  |  |  |
|  |  |  |
|  |  |  |
|  |  |  |
|  |  |  |
|  |  |  |
|  |  |  |
|  |  |  |
|  |  |  |
|  |  |  |
|  |  |  |
